# Supplementary material for: Sonic hedgehog expression in steatohepatitic hepatocellular carcinoma and its clinicopathological significance
Source: PubMed Central journal article supplement — Oncol Lett. 2024 Jul 18;28(3):442. doi: 10.3892/ol.2024.14575 (PMC11292461; doi:10.3892/ol.2024.14575), 2024-07-18

Figure S1. Representative images of steatohepatic hepatocellular carcinoma. (A) Gross pathology. (B) Low-power imaging (H&E staining). (C) Low-power imaging (azan staining). (D) Low-power imaging (SHh immunohistochemistry). (E) Tumors showing ballooning, steatosis, inflammatory cell infiltration and fibrosis (H&E staining). (F) SHh-positive tumor cells (SHh immunohistochemistry). (G) Non-tumorous liver shows steatohepatitis (H&E staining). (H) Ballooned hepatocytes are positive for SHh (SHh immunohistochemistry). SHh, sonic hedgehog.

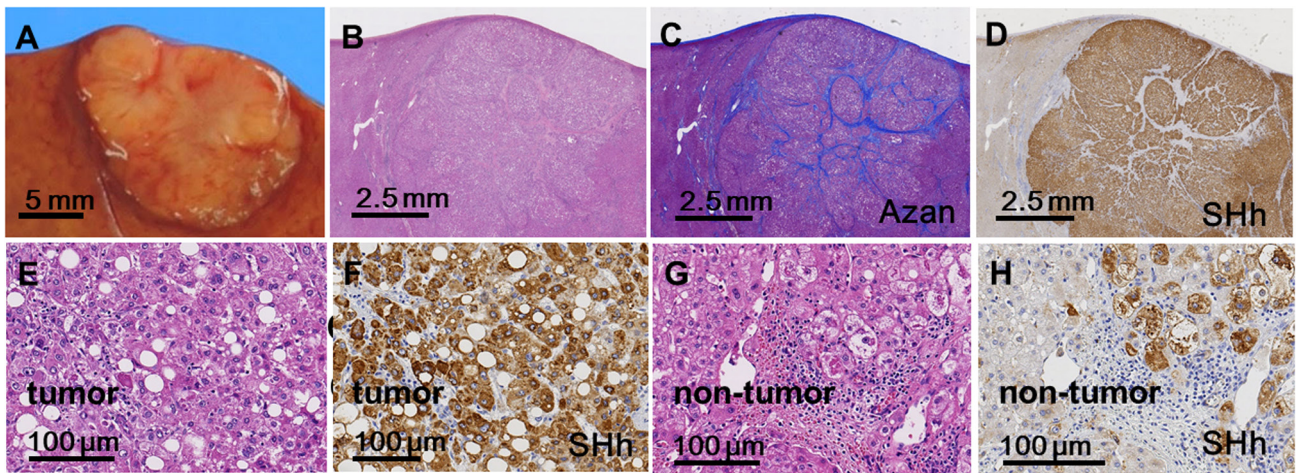

Supplement: Supplementary_Data.pdf [file Supplementary_Data.pdf]
